# Supplementary material for: Number-Based Visual Generalisation in the Honeybee
Source: PubMed Central journal article supplement (PMC2629729; doi:10.1371/journal.pone.0004263), 2009-01-28
Supplement: pone.0004263.s005.pdf [file pone.0004263.s005.pdf]

Table S3a

|                  | Transfer 2v3-1           |                          | Transfer 2v3-2           |                          | Transfer 2v3-3           |                          | Transfer 2v3-4           |                          | Transfer 2v3-5           |                          | Summary |       |       |      |
|------------------|--------------------------|--------------------------|--------------------------|--------------------------|--------------------------|--------------------------|--------------------------|--------------------------|--------------------------|--------------------------|---------|-------|-------|------|
| Choice patterns  |                          |                          |                          |                          |                          |                          |                          |                          |                          |                          |         |       |       |      |
| Rewarded pattern | 2+<br>0° 180°<br>(R) (L) | 3+<br>0° 180°<br>(R) (L) | 2+<br>0° 180°<br>(R) (L) | 3+<br>0° 180°<br>(R) (L) | 2+<br>0° 180°<br>(R) (L) | 3+<br>0° 180°<br>(R) (L) | 2+<br>0° 180°<br>(R) (L) | 3+<br>0° 180°<br>(R) (L) | 2+<br>0° 180°<br>(R) (L) | 3+<br>0° 180°<br>(R) (L) | 2+      | 3+    | %     |      |
| Bee 02           | + +                      | + +                      | + +                      | + +                      | + -                      | +                        | - +                      | + -                      | + +                      | + +                      | + +     | 8+,2- | 8+,1- | 0.84 |
| Bee 12           | + -                      | + +                      |                          | + +                      | - +                      | - +                      |                          |                          |                          | + +                      |         | 4+,2- | 7+,1- | 0.79 |
| Bee 1 4          | + +                      | -                        | +                        | + -                      | + +                      | - +                      | + +                      | + +                      | - +                      | + +                      |         | 8+,1- | 6+,4- | 0.74 |
| Sample pattern   |                          |                          |                          |                          |                          |                          |                          |                          |                          |                          |         |       |       |      |

Table S3b

|                 | Control-same areas       |                          |      | Control-same edges       |                          |      | Transfer 3v4             |                          |      | Transfer 4v5             |                          |     | Control 4v5-1            |                          |      |
|-----------------|--------------------------|--------------------------|------|--------------------------|--------------------------|------|--------------------------|--------------------------|------|--------------------------|--------------------------|-----|--------------------------|--------------------------|------|
| Choice Patterns |                          |                          |      |                          |                          |      |                          |                          |      |                          |                          |     |                          |                          |      |
| Reward pattern  | 2+<br>0° 180°<br>(R) (L) | 3+<br>0° 180°<br>(R) (L) | %    | 2+<br>0° 180°<br>(R) (L) | 3+<br>0° 180°<br>(R) (L) | %    | 3+<br>0° 180°<br>(R) (L) | 4+<br>0° 180°<br>(R) (L) | %    | 4+<br>0° 180°<br>(R) (L) | 5+<br>0° 180°<br>(R) (L) | %   | 4+<br>0° 180°<br>(R) (L) | 5+<br>0° 180°<br>(R) (L) | %    |
| Bee 02          | + +                      | + +                      | 1.0  | + +                      | + +                      | 1.0  | + +                      | + +                      | 1.0  | -                        | +                        | 0.5 | + -                      | + +                      | 0.75 |
| Bee 12          | + +                      | - +                      | 0.75 | + +                      | + +                      | 1.0  | + +                      | - +                      | 0.75 | -                        | - +                      | 0.3 | - +                      | + +                      | 0.75 |
| Bee 14          | - +                      | + +                      | 0.75 | + +                      | + -                      | 0.75 | + +                      | + -                      | 0.75 | - +                      | - +                      | 0.5 | + +                      | + -                      | 0.75 |
| Sample pattern  |                          |                          |      |                          |                          |      |                          |                          |      |                          |                          |     |                          |                          |      |
