# Supplementary material for: Number-Based Visual Generalisation in the Honeybee
Source: PubMed Central journal article supplement (PMC2629729; doi:10.1371/journal.pone.0004263), 2009-01-28
Supplement: pone.0004263.s006.pdf [file pone.0004263.s006.pdf]

Table S4

|                   | Transfer tests 1         |                          | Transfer tests 2         |                          | Transfer tests 3         |                          | Transfer tests 4         |                         | Transfer tests 5        |                         | Transfer tests 6         |                          |
|-------------------|--------------------------|--------------------------|--------------------------|--------------------------|--------------------------|--------------------------|--------------------------|-------------------------|-------------------------|-------------------------|--------------------------|--------------------------|
| Choice Patterns   |                          |                          |                          |                          |                          |                          |                          |                         |                         |                         |                          |                          |
| Reward ed pattern | 2+<br>0° 180°<br>(R) (L) | 3+<br>0° 180°<br>(R) (L) | 2+<br>0° 180°<br>(R) (L) | 3+<br>0° 180°<br>(R) (L) | 3+<br>0° 180°<br>(R) (L) | 2+<br>0° 180°<br>(R) (L) | 2+<br>0° 180°<br>(R) (L) | 3<br>0° 180°<br>(R) (L) | 3<br>0° 180°<br>(R) (L) | 2<br>0° 180°<br>(R) (L) | 2+<br>0° 180°<br>(R) (L) | 3+<br>0° 180°<br>(R) (L) |
| Bee 10            | + +                      | - +                      | + -                      | + +                      | + +                      | + -                      |                          | + +                     | + +                     | +                       |                          |                          |
| Bee 16            |                          | + +                      | + +                      | - +                      | - +                      | - +                      |                          |                         | + +                     |                         |                          | + +                      |
| Bee 21            | + -                      | + -                      | + +                      | - +                      | + -                      | + +                      | + +                      | + -                     | + +                     | + -                     | + -                      | + +                      |
| Bee 31            | + -                      | + +                      | + +                      | - +                      | + +                      | + +                      | + +                      | - +                     | + +                     | + +                     | + -                      | + +                      |
| Bee 60            | - +                      | + +                      | + +                      | + -                      | + +                      | + -                      |                          | + +                     | + -                     | + -                     | + +                      | - +                      |
| Sample pattern    |                          |                          |                          |                          |                          |                          |                          |                         |                         |                         |                          |                          |
